# Supplementary material for: Variants in Interferon Lambda are Associated with Very Early Onset Inflammatory Bowel Disease
Source: bioRxiv or medRxiv preprint supplement (doi:10.1101/2022.03.17.22271929), 2022-03-20

## **Supplemental Figures:**

### **Supplemental Figure 1: Dose response curves in response to WT and patient-encoded variants.**

**(A)** EC50 comparison between IFN- $\lambda$ 2 and IFN- $\lambda$ 2Var from dose response curve described in Figure 2A.

**(B)** Dose-response curve of downstream ISG induction following stimulation with either IFN- $\lambda$ 3 or IFN- $\lambda$ 3Var1. Normalized relative luciferase units (RLU) shown.

**(C)** EC50 comparison between IFN- $\lambda$ 3 and IFN- $\lambda$ 3Var1. EC50 not quantifiable for IFN- $\lambda$ 3Var1.

**(D)** Dose-response curve of downstream ISG induction following stimulation with either IFN- $\lambda$ 3 or IFN- $\lambda$ 3Var2. Normalized relative luciferase units (RLU) shown.

**(E)** EC50 comparison between IFN- $\lambda$ 3 and IFN- $\lambda$ 3Var2.

**(F)** Induction of ISGs following stimulation of healthy control tHIOs with either WT IFN- $\lambda$ 2 (yellow dots), patient-encoded IFN- $\lambda$ 2Var (peach dots), or no treatment (black dots). HP1 = Healthy parent 1; HP2 = healthy parent 2; SI = small intestinal enteroids of unrelated healthy control

**(G)** EC50 comparison between INF- $\lambda$ 2 and INF- $\lambda$ 2Var in dimerization assay with IFNLR1 and IL10RB

**(H)** EC50 comparison between INF- $\lambda$ 3 and INF- $\lambda$ 3Var1 in dimerization assay with IFNLR1 and IL10RB

(B-E, G, H) Data depicts three independent experiments, each data point is an independent experiment. RLU were normalized to blank wells (no protein). (C,E,G,H) Statistical significance determined by unpaired t-test between the groups.

# Supplemental Figure 1

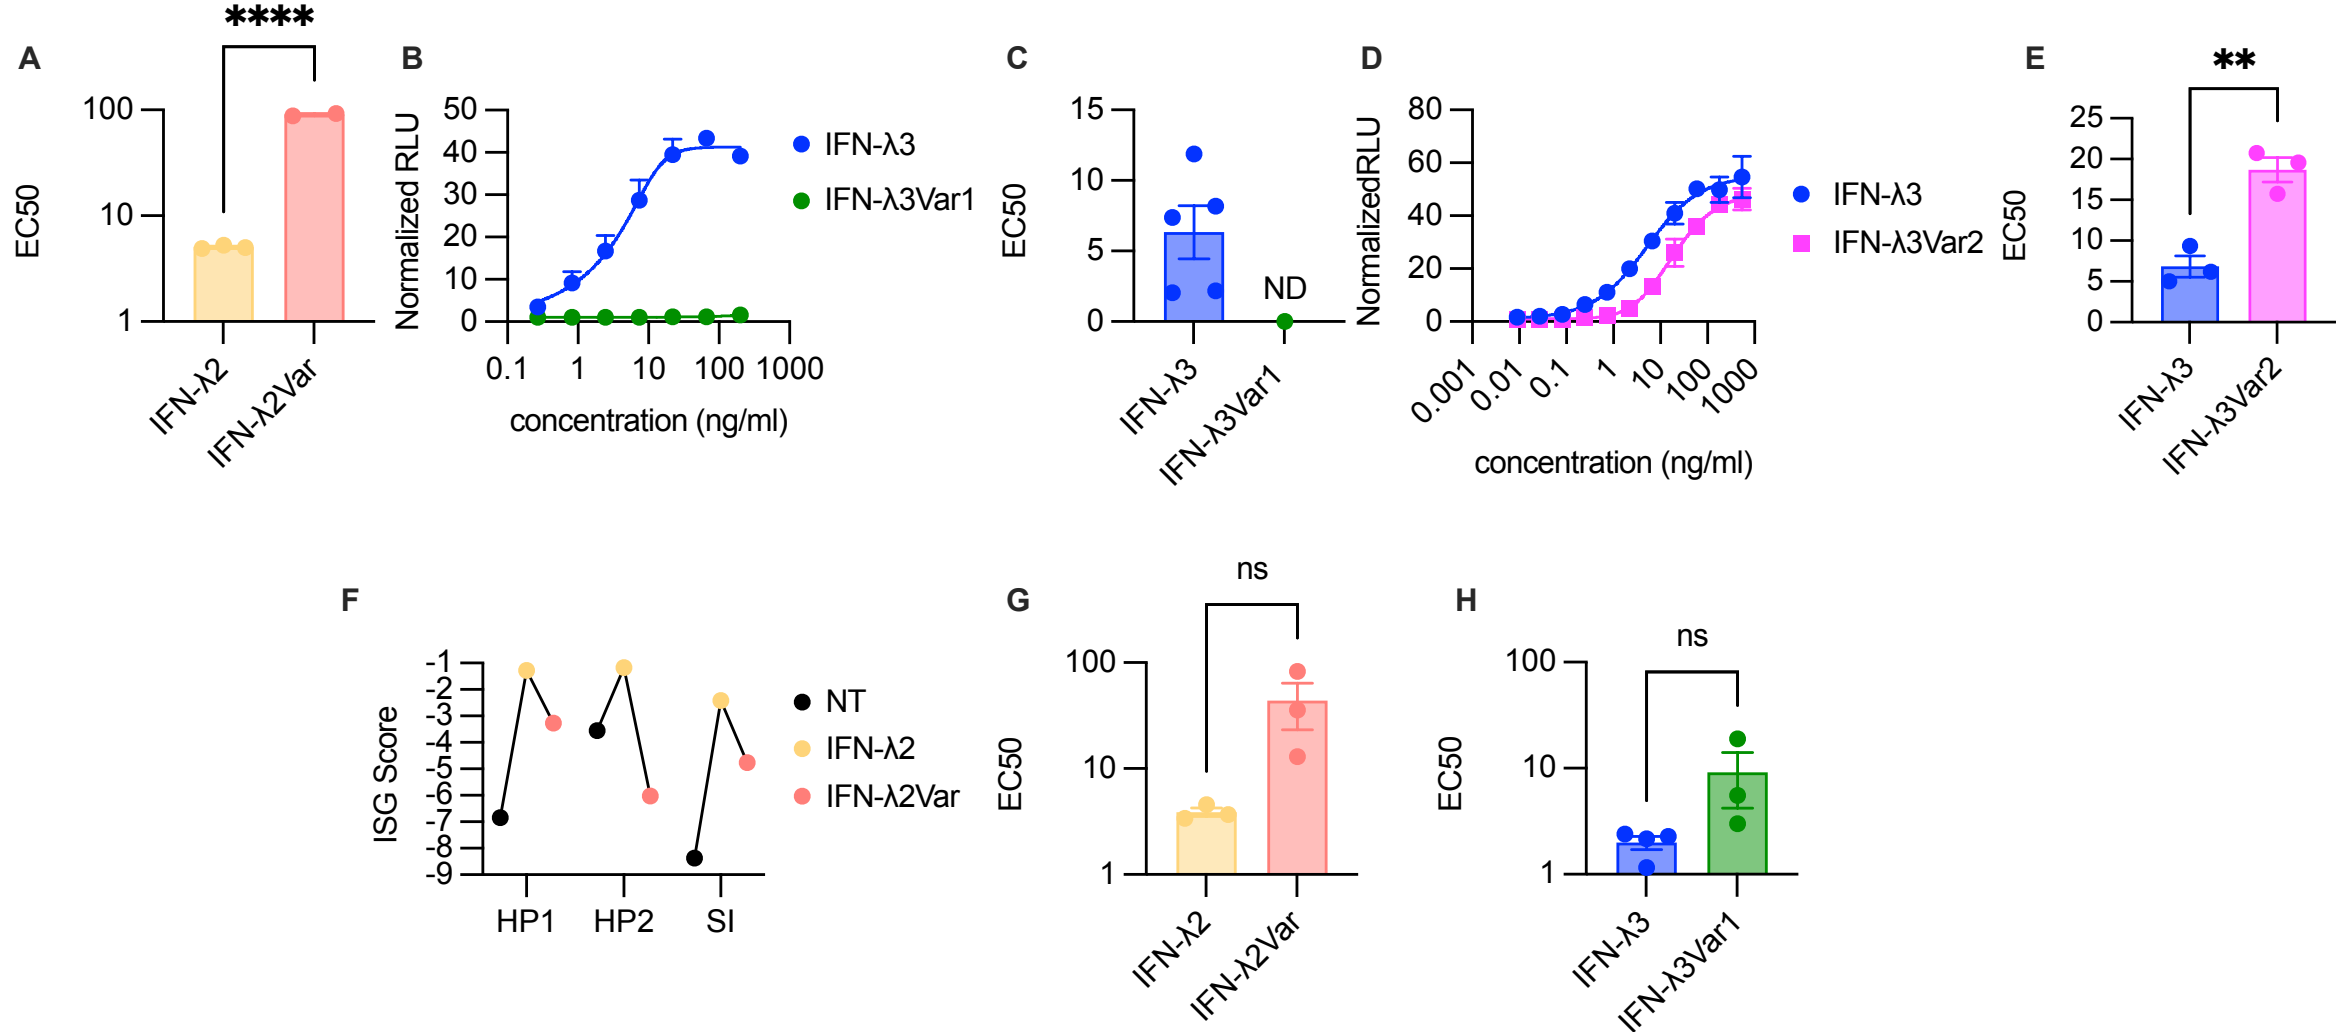

Supplement: Supplementary file [file media-1.pdf]
